# Supplementary material for: Sticking under Wet Conditions: The Remarkable Attachment Abilities of the Torrent Frog, Staurois guttatus
Source: PLOS journal article supplement (doi:10.1371/journal.pone.0073810), 2013-09-25
Supplement: S2 (10.1371/journal.pone.0073810.s002) [file journal.pone.0073810.s002]

**Table S1.** Mann-Whitney U-tests for the comparisons of the *slip angles* for *R. pardalis* under different testing regimes. ‘smooth’, ‘30  $\mu\text{m}$ ’ and ‘1125  $\mu\text{m}$ ’ refers to the substrate roughness; ‘dry’, ‘low flow rate’ and ‘high flow rate’ refer to the amount of water on the surface.

| No. | Substrate condition | Test                                           | $z$   | $R$  | $p$    |
|-----|---------------------|------------------------------------------------|-------|------|--------|
| 1   | smooth              | dry <i>vs.</i> low flow rate                   | 1.39  | 2602 | >0.05  |
| 2   | smooth              | dry <i>vs.</i> high flow rate                  | 9.18  | 3775 | <0.001 |
| 3   | smooth              | low <i>vs.</i> high flow rate                  | 9.07  | 3775 | <0.001 |
| 4   | 30 $\mu\text{m}$    | dry <i>vs.</i> low flow rate                   | NA    | 2525 | NA     |
| 5   | 30 $\mu\text{m}$    | dry <i>vs.</i> high flow rate                  | 9.23  | 3775 | <0.001 |
| 6   | 30 $\mu\text{m}$    | low <i>vs.</i> high flow rate                  | 9.23  | 3775 | <0.001 |
| 7   | 1125 $\mu\text{m}$  | dry <i>vs.</i> low flow rate                   | -2.17 | 2377 | =0.09  |
| 8   | 1125 $\mu\text{m}$  | dry <i>vs.</i> high flow rate                  | 8.96  | 3772 | <0.001 |
| 9   | 1125 $\mu\text{m}$  | low <i>vs.</i> high flow rate                  | 9.17  | 3775 | <0.001 |
| 10  | dry                 | smooth <i>vs.</i> 30 $\mu\text{m}$             | -0.98 | 2500 | >0.05  |
| 11  | dry                 | smooth <i>vs.</i> 1125 $\mu\text{m}$           | 2.2   | 2676 | =0.08  |
| 12  | dry                 | 30 $\mu\text{m}$ <i>vs.</i> 1125 $\mu\text{m}$ | 2.72  | 2700 | <0.05  |
| 13  | low flow rate       | smooth <i>vs.</i> 30 $\mu\text{m}$             | -2.02 | 2425 | >0.05  |
| 14  | low flow rate       | smooth <i>vs.</i> 1125 $\mu\text{m}$           | -1.34 | 2451 | >0.05  |
| 15  | low flow rate       | 30 $\mu\text{m}$ <i>vs.</i> 1125 $\mu\text{m}$ | 0.98  | 2550 | >0.05  |
| 16  | high flow rate      | smooth <i>vs.</i> 30 $\mu\text{m}$             | -6.28 | 1618 | <0.001 |
| 17  | high flow rate      | smooth <i>vs.</i> 1125 $\mu\text{m}$           | -5.88 | 1674 | <0.001 |
| 18  | high flow rate      | 30 $\mu\text{m}$ <i>vs.</i> 1125 $\mu\text{m}$ | -1.95 | 2244 | >0.05  |

**Table S2.** Mann-Whitney U-tests for the comparisons of the *fall angles* for *R. pardalis* under different testing regimes. ‘smooth’, ‘30  $\mu\text{m}$ ’ and ‘1125  $\mu\text{m}$ ’ refers to the substrate roughness; ‘dry’, ‘low flow rate’ and ‘high flow rate’ refer to the amount of water on the surface.

| No. | Substrate condition | Test                                           | $z$   | $R$  | $p$    |
|-----|---------------------|------------------------------------------------|-------|------|--------|
| 1   | smooth              | dry <i>vs.</i> low flow rate                   | 3.28  | 2994 | <0.01  |
| 2   | smooth              | dry <i>vs.</i> high flow rate                  | 6.33  | 3439 | <0.001 |
| 3   | smooth              | low <i>vs.</i> high flow rate                  | 4.63  | 3196 | <0.001 |
| 4   | 30 $\mu\text{m}$    | dry <i>vs.</i> low flow rate                   | -4.88 | 1860 | <0.001 |
| 5   | 30 $\mu\text{m}$    | dry <i>vs.</i> high flow rate                  | 8.64  | 3775 | <0.001 |
| 6   | 30 $\mu\text{m}$    | low <i>vs.</i> high flow rate                  | 8.84  | 3775 | <0.001 |
| 7   | 1125 $\mu\text{m}$  | dry <i>vs.</i> low flow rate                   | -7.35 | 1464 | <0.001 |
| 8   | 1125 $\mu\text{m}$  | dry <i>vs.</i> high flow rate                  | 6.91  | 3527 | <0.001 |
| 9   | 1125 $\mu\text{m}$  | low <i>vs.</i> high flow rate                  | 7.94  | 3674 | <0.001 |
| 10  | dry                 | smooth <i>vs.</i> 30 $\mu\text{m}$             | 3.08  | 2964 | <0.01  |
| 11  | dry                 | smooth <i>vs.</i> 1125 $\mu\text{m}$           | 8.36  | 3732 | <0.001 |
| 12  | dry                 | 30 $\mu\text{m}$ <i>vs.</i> 1125 $\mu\text{m}$ | 6.32  | 3440 | <0.001 |
| 13  | low flow rate       | smooth <i>vs.</i> 30 $\mu\text{m}$             | -5.19 | 1808 | <0.001 |
| 14  | low flow rate       | smooth <i>vs.</i> 1125 $\mu\text{m}$           | -2.23 | 2205 | =0.07  |
| 15  | low flow rate       | 30 $\mu\text{m}$ <i>vs.</i> 1125 $\mu\text{m}$ | 3.24  | 2955 | <0.01  |
| 16  | high flow rate      | smooth <i>vs.</i> 30 $\mu\text{m}$             | 3.03  | 2964 | <0.01  |
| 17  | high flow rate      | smooth <i>vs.</i> 1125 $\mu\text{m}$           | 2.12  | 2833 | >0.05  |
| 18  | high flow rate      | 30 $\mu\text{m}$ <i>vs.</i> 1125 $\mu\text{m}$ | -2.41 | 2176 | <0.05  |

**Table S3.** Mann-Whitney U-tests for the comparisons of the *slip angles* for *S. guttatus* under different testing regimes. ‘smooth’, ‘30  $\mu\text{m}$ ’ and ‘1125  $\mu\text{m}$ ’ refers to the substrate roughness; ‘dry’, ‘low flow rate’ and ‘high flow rate’ refer to the amount of water on the surface. When the sample size was too small no z-value could be computed; when both samples contained identical values, no p-value could be obtained (‘NA’: not applicable).

| No. | Substrate condition | Test                                           | $z$   | $R$  | $p$    |
|-----|---------------------|------------------------------------------------|-------|------|--------|
| 1   | smooth              | dry <i>vs.</i> low flow rate                   | 1.74  | 2600 | >0.05  |
| 2   | smooth              | dry <i>vs.</i> high flow rate                  | -9.11 | 1081 | <0.001 |
| 3   | smooth              | low <i>vs.</i> high flow rate                  | -8.98 | 1081 | <0.001 |
| 4   | 30 $\mu\text{m}$    | dry <i>vs.</i> low flow rate                   | NA    | 2525 | NA     |
| 5   | 30 $\mu\text{m}$    | dry <i>vs.</i> high flow rate                  | 8.92  | 3725 | <0.001 |
| 6   | 30 $\mu\text{m}$    | low <i>vs.</i> high flow rate                  | 8.92  | 3725 | <0.001 |
| 7   | 1125 $\mu\text{m}$  | dry <i>vs.</i> low flow rate                   | -1.41 | 2475 | >0.05  |
| 8   | 1125 $\mu\text{m}$  | dry <i>vs.</i> high flow rate                  | -7.71 | 1343 | <0.001 |
| 9   | 1125 $\mu\text{m}$  | low <i>vs.</i> high flow rate                  | -7.93 | 1328 | <0.001 |
| 10  | dry                 | smooth <i>vs.</i> 30 $\mu\text{m}$             | NA    | 2525 | NA     |
| 11  | dry                 | smooth <i>vs.</i> 1125 $\mu\text{m}$           | 1.41  | 2575 | >0.05  |
| 12  | dry                 | 30 $\mu\text{m}$ <i>vs.</i> 1125 $\mu\text{m}$ | 1.41  | 2575 | >0.05  |
| 13  | low flow rate       | smooth <i>vs.</i> 30 $\mu\text{m}$             | -1.74 | 2450 | >0.05  |
| 14  | low flow rate       | smooth <i>vs.</i> 1125 $\mu\text{m}$           | -1.74 | 2450 | >0.05  |
| 15  | low flow rate       | 30 $\mu\text{m}$ <i>vs.</i> 1125 $\mu\text{m}$ | NA    | 2525 | NA     |
| 16  | high flow rate      | smooth <i>vs.</i> 30 $\mu\text{m}$             | -5.06 | 1542 | <0.001 |
| 17  | high flow rate      | smooth <i>vs.</i> 1125 $\mu\text{m}$           | -7.53 | 1183 | <0.001 |
| 18  | high flow rate      | 30 $\mu\text{m}$ <i>vs.</i> 1125 $\mu\text{m}$ | 3.24  | 2752 | <0.01  |

**Table S4.** Mann-Whitney U-tests for the comparisons of the *slip angles* between the two frog species under different testing regimes. ‘smooth’, ‘30  $\mu\text{m}$ ’ and ‘1125  $\mu\text{m}$ ’ refers to the substrate roughness; ‘dry’, ‘low flow rate’ and ‘high flow rate’ refer to the amount of water on the surface. When the sample size was too small no z-value could be computed; when both samples contained identical values, no p-value could be obtained (‘NA’: not applicable).

| No. | Substrate condition | Test           | $z$   | $R$  | $p$    |
|-----|---------------------|----------------|-------|------|--------|
| 1   | smooth              | dry            | -0.98 | 2500 | >0.05  |
| 2   | smooth              | low flow rate  | -0.31 | 2505 | >0.05  |
| 3   | smooth              | high flow rate | 3.99  | 2773 | <0.001 |
| 4   | 30 $\mu\text{m}$    | dry            | NA    | 2525 | NA     |
| 5   | 30 $\mu\text{m}$    | low flow rate  | NA    | 2525 | NA     |
| 6   | 30 $\mu\text{m}$    | high flow rate | -3.52 | 2017 | <0.01  |
| 7   | 1125 $\mu\text{m}$  | dry            | -1.67 | 2404 | >0.05  |
| 8   | 1125 $\mu\text{m}$  | low flow rate  | -0.98 | 2500 | >0.05  |
| 9   | 1125 $\mu\text{m}$  | high flow rate | 4.95  | 2988 | <0.001 |

**Table S5.** Mann-Whitney U-tests for the comparisons of the *fall angles* for *S. guttatus* under different testing regimes. ‘smooth’, ‘30  $\mu\text{m}$ ’ and ‘1125  $\mu\text{m}$ ’ refers to the substrate roughness; ‘dry’, ‘low flow rate’ and ‘high flow rate’ refer to the amount of water on the surface.

| No. | Substrate condition | Test                                           | $z$   | $R$  | $p$    |
|-----|---------------------|------------------------------------------------|-------|------|--------|
| 1   | smooth              | dry <i>vs.</i> low flow rate                   | -1.85 | 2308 | >0.05  |
| 2   | smooth              | dry <i>vs.</i> high flow rate                  | -5.99 | 1428 | <0.001 |
| 3   | smooth              | low <i>vs.</i> high flow rate                  | -7.53 | 1239 | <0.001 |
| 4   | 30 $\mu\text{m}$    | dry <i>vs.</i> low flow rate                   | -6.84 | 1596 | <0.001 |
| 5   | 30 $\mu\text{m}$    | dry <i>vs.</i> high flow rate                  | 3.61  | 3049 | <0.001 |
| 6   | 30 $\mu\text{m}$    | low <i>vs.</i> high flow rate                  | 8.3   | 3685 | <0.001 |
| 7   | 1125 $\mu\text{m}$  | dry <i>vs.</i> low flow rate                   | -7.7  | 1435 | <0.001 |
| 8   | 1125 $\mu\text{m}$  | dry <i>vs.</i> high flow rate                  | 6.13  | 3152 | <0.001 |
| 9   | 1125 $\mu\text{m}$  | low <i>vs.</i> high flow rate                  | -4.34 | 1727 | <0.001 |
| 10  | dry                 | smooth <i>vs.</i> 30 $\mu\text{m}$             | 5.44  | 3289 | <0.001 |
| 11  | dry                 | smooth <i>vs.</i> 1125 $\mu\text{m}$           | 7.7   | 3624 | <0.001 |
| 12  | dry                 | 30 $\mu\text{m}$ <i>vs.</i> 1125 $\mu\text{m}$ | 3.28  | 3001 | <0.01  |
| 13  | low flow rate       | smooth <i>vs.</i> 30 $\mu\text{m}$             | -0.45 | 2479 | >0.05  |
| 14  | low flow rate       | smooth <i>vs.</i> 1125 $\mu\text{m}$           | 1.03  | 2641 | >0.05  |
| 15  | low flow rate       | 30 $\mu\text{m}$ <i>vs.</i> 1125 $\mu\text{m}$ | 1.45  | 2684 | >0.05  |
| 16  | high flow rate      | smooth <i>vs.</i> 30 $\mu\text{m}$             | 1.34  | 2414 | >0.05  |
| 17  | high flow rate      | smooth <i>vs.</i> 1125 $\mu\text{m}$           | -4.17 | 1619 | <0.001 |
| 18  | high flow rate      | 30 $\mu\text{m}$ <i>vs.</i> 1125 $\mu\text{m}$ | 5.84  | 3112 | <0.001 |

**Table S6.** Mann-Whitney U-tests for the comparisons of the *fall angles* between the two frog species under different testing regimes. ‘smooth’, ‘30  $\mu\text{m}$ ’ and ‘1125  $\mu\text{m}$ ’ refers to the substrate roughness; ‘dry’, ‘low flow rate’ and ‘high flow rate’ refer to the amount of water on the surface.

| No. | Substrate condition | Test           | $z$   | $R$  | $p$    |
|-----|---------------------|----------------|-------|------|--------|
| 1   | smooth              | dry            | -1.97 | 2260 | >0.05  |
| 2   | smooth              | low flow rate  | -6.07 | 1694 | <0.001 |
| 3   | smooth              | high flow rate | 2.33  | 2549 | =0.059 |
| 4   | 30 $\mu\text{m}$    | dry            | 1.93  | 2804 | >0.05  |
| 5   | 30 $\mu\text{m}$    | low flow rate  | -1.3  | 2385 | >0.05  |
| 6   | 30 $\mu\text{m}$    | high flow rate | -6.36 | 1605 | <0.001 |
| 7   | 1125 $\mu\text{m}$  | dry            | -1.8  | 2264 | >0.05  |
| 8   | 1125 $\mu\text{m}$  | low flow rate  | -3.23 | 2095 | <0.01  |
| 9   | 1125 $\mu\text{m}$  | high flow rate | 7.55  | 3349 | <0.001 |

**Table S7.** Mann-Whitney U-tests for the comparison of *friction force per contact area* for different body parts under different conditions *between* the two frog species. ‘smooth’, ‘0.3  $\mu\text{m}$ ’ and ‘16  $\mu\text{m}$ ’ refers to the substrate roughness; ‘dry’ and ‘wet’ refer to the absence or presence of water on the surface, respectively. When the sample size was too small no z-value could be computed; when both samples contained identical values, no p-value could be obtained (‘NA’: not applicable).

| No. | Body part | Substrate condition              | $N$ | $z$   | $R$  | $p$    |
|-----|-----------|----------------------------------|-----|-------|------|--------|
| 1   | pad       | dry, smooth                      | 34  | -2.28 | 1129 | <0.05  |
| 2   | pad       | low flow rate, smooth            | 11  | 0.37  | 168  | >0.05  |
| 3   | belly     | dry, smooth                      | 10  | 3.87  | 45   | <0.001 |
| 4   | belly     | low flow rate, smooth            | 13  | 1.81  | 182  | =0.06  |
| 5   | thigh     | dry, smooth                      | 11  | 1.93  | 116  | =0.053 |
| 6   | thigh     | low flow rate, smooth            | 12  | 0.25  | 155  | >0.05  |
| 7   | pad       | dry, 0.3 $\mu\text{m}$           | 6   | NA    | 54   | >0.05  |
| 8   | pad       | low flow rate, 0.3 $\mu\text{m}$ | 4   | NA    | 41   | <0.01  |
| 9   | pad       | dry, 16 $\mu\text{m}$            | 8   | NA    | 83   | >0.05  |
| 10  | pad       | low flow rate, 16 $\mu\text{m}$  | 8   | NA    | 95   | <0.01  |

**Table S8.** Mann-Whitney U-tests for the comparison of *adhesive force per contact area* for different body parts under different conditions *between* the two frog species. ‘smooth’, ‘0.3  $\mu\text{m}$ ’ and ‘16  $\mu\text{m}$ ’ refers to the substrate roughness; ‘dry’ and ‘wet’ refer to the absence or presence of water on the surface, respectively. When the sample size was too small no z-value could be computed; when both samples contained identical values, no p-value could be obtained (‘NA’: not applicable).

| No. | Body part | Substrate condition              | $N$ | $z$   | $R$  | $p$    |
|-----|-----------|----------------------------------|-----|-------|------|--------|
| 1   | pad       | dry, smooth                      | 34  | -2.2  | 1129 | <0.05  |
| 2   | pad       | low flow rate, smooth            | 11  | 0.37  | 168  | >0.05  |
| 3   | belly     | dry, smooth                      | 10  | 0.79  | 162  | >0.05  |
| 4   | belly     | low flow rate, smooth            | 13  | -1.53 | 193  | >0.05  |
| 5   | thigh     | dry, smooth                      | 11  | 0.39  | 186  | >0.05  |
| 6   | thigh     | low flow rate, smooth            | 12  | 0.019 | 199  | >0.05  |
| 7   | pad       | dry, 0.3 $\mu\text{m}$           | 6   | NA    | 54   | =0.054 |
| 8   | pad       | low flow rate, 0.3 $\mu\text{m}$ | 4   | NA    | 41   | <0.05  |
| 9   | pad       | dry, 16 $\mu\text{m}$            | 8   | NA    | 83   | =0.08  |
| 10  | pad       | low flow rate, 16 $\mu\text{m}$  | 8   | NA    | 95   | =0.09  |
